# Supplementary material for: Metal–organic frameworks-based biosensor for microRNA detection in prostate cancer cell lines
Source: Royal Society of Chemistry journal article supplement (doi:10.1039/d2ra04959g), 2022-01-01
Supplement: d2ra04959g1.pdf [file d2ra04959g1.pdf]

## Supplementary Date

### **Metal–organic frameworks-based biosensor for MicroRNA detection in prostate cancer cell lines**

Milad Ahmadi Najafabadi<sup>1</sup>, Fatemeh Yousefi<sup>2</sup>, Mohammad J. Rasaei<sup>1\*</sup>, Masoud Soleimani<sup>3\*</sup>,  
Mahmood Kazemzad<sup>4</sup>

1 Department of Medical Biothecnology, Faculty of Medical Sciences, Tarbiat Modares University,  
Tehran, Iran

2 Department of Department of Genetics, Faculty of Biological Sciences, Tarbiat Modares  
University, Tehran, Iran

3 Department of Hematology, Faculty of Medical Sciences, Tarbiat Modares University, Tehran,  
Iran

4 Material & Energy Center (MERC), Tehran, Iran

\*Corresponding author e-mail: [rasaei\\_mj@yahoo.com](mailto:rasaei_mj@yahoo.com); [Soleimani.masoud@gmail.com](mailto:Soleimani.masoud@gmail.com)

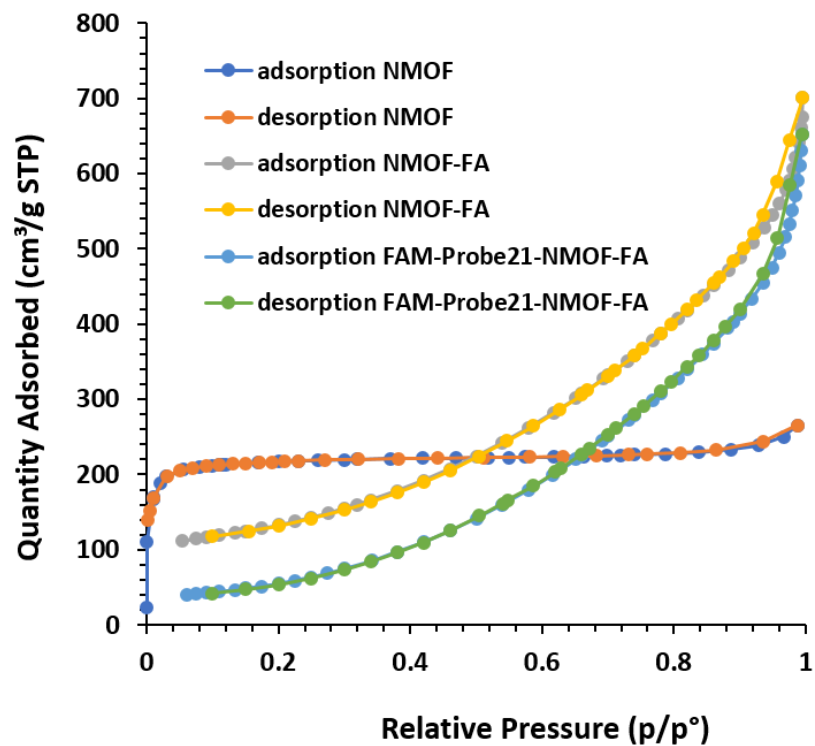

**Figure S1:** Nitrogen adsorption-desorption isotherms of NMOF(UIO-66-NH<sub>2</sub>), NMOF-FA and Probe21-NMOF-FA.

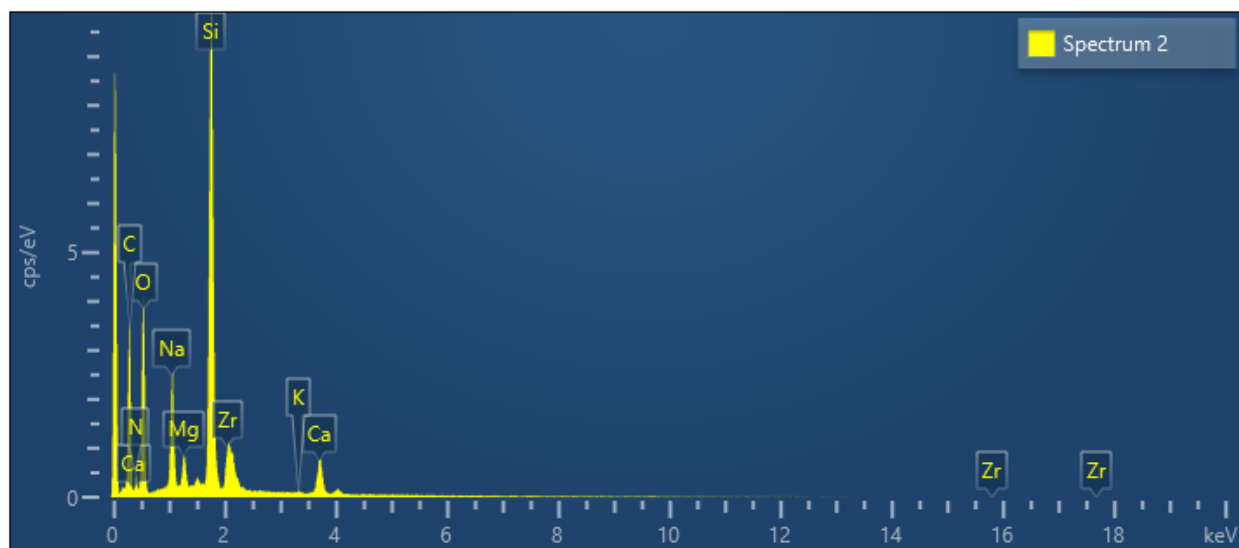

**Figure S2:** Energy-Dispersive X-ray (EDX) spectroscopy of UIO-66-NH<sub>2</sub>

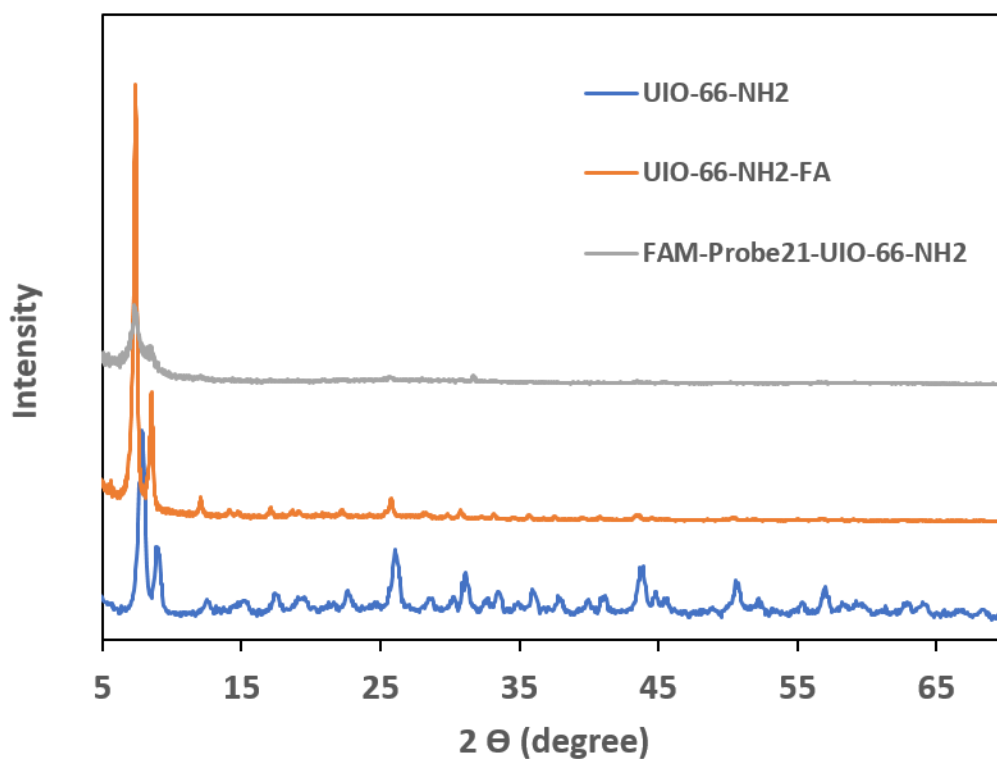

**Figure S3:** X-ray diffraction patterns (EXRD) of NMOF (UIO-66-NH<sub>2</sub>), UIO-66-NH<sub>2</sub>-FA and Probe21-UIO-66-NH<sub>2</sub>-FA.

**Table S1:** Experimental data for the stability and reproducibility of FAM-Probe21-NMOF. Concentration of NMOF, FAM-Probe21 and miR-21 were 3  $\mu$ g/mL, 5  $\mu$ M and 1  $\mu$ M, respectively.

| <b>Stability</b>              |          |          |          |          |               |
|-------------------------------|----------|----------|----------|----------|---------------|
| <b>Test</b>                   | <b>1</b> | <b>2</b> | <b>3</b> | <b>4</b> | <b>RSD(%)</b> |
| <b>Fluorescence intensity</b> | 1226.4   | 1212.4   | 1205.1   | 1202.5   | 0.88%         |
| <b>Reproducibility</b>        |          |          |          |          |               |
| <b>Biosensor</b>              | <b>1</b> | <b>2</b> | <b>3</b> | <b>4</b> | <b>RSD(%)</b> |
| <b>Fluorescence intensity</b> | 1226.6   | 1207.6   | 1218.8   | 1201.5   | 0.92%         |
